# A protocol for the co-creation and usability/acceptability testing of an evidence-based, patient-centred intervention for self-management of urinary incontinence in older men

Olawunmi Olagundoye<sup>1\*</sup>, William Gibson<sup>1</sup>, Adrian Wagg<sup>1</sup>

<sup>1</sup> University of Alberta, College of Health Sciences, Faculty of Medicine & Dentistry, Department of Medicine, Division of Geriatric Medicine. 1-198 Clinical Sciences Building  
11350 – 83 Ave, Edmonton, AB, Canada T6G 2G3

\* Corresponding author

Email address: [olagundo@ualberta.ca](mailto:olagundo@ualberta.ca) (OO)

## Acknowledgements

The research study will contribute towards a PhD degree award for OO.

## Abstract

Male urinary incontinence (UI) is most prevalent in older men, with one in three men aged 65 and above having problems maintaining continence. Addressing health inequalities, male-female disparities in continence services, and low health-seeking behavior among men emphasizes the necessity for co-creating an intervention that empowers them to self-manage their UI.

We aim to co-create a self-management intervention with an older men and Health care provider (HCP) group and assess its usability/acceptability among older men with UI.

The intervention mapping (IM) framework, a co-creation strategy, will be used to co-create a self-management tool, followed by usability/acceptability testing. The study will be guided by the first four IM steps: the logic model of the problem, the logic model of change, program/intervention design, and program/intervention production, followed by preliminary testing. A participatory group of older men with UI recruited from an existing group of patient partners, and continence care experts will be involved in all steps of the IM process. Usability/acceptability testing will be conducted on a sample of 20 users recruited through seniors' associations and retirement living facilities. After accessing the self-management tool for a week, participants will complete a product usability testing scale (aka System Usability Scale-SUS) and/or an acceptability test, depending on the preferred mode(s) of intervention delivery. Data will be analyzed using descriptive statistics. A benchmark overall mean usability score of 70 represents a good/usable product, based on the large database of SUS scores.

# Introduction

## Impact of UI on older men

UI is defined by the International Continence Society as the complaint of any involuntary leakage of urine [1]. In addition to the adverse effects on physical health, UI is associated with feelings of shame and stigma. It fosters dependence and heightens care demands on family members or friends of an older individual, significantly affecting their wellbeing. UI leads to increased healthcare expenses for older adults [2,3]. It is also often seen as a sign of incompetence in older adults, which can greatly harm their self-esteem [4].

Men are often reluctant to address their incontinence with healthcare providers. Available data indicate that only one out of five men with symptoms seek medical care. Men are half as likely as women to seek care, with only 22% of men seeking assistance compared to 45% of women [5–7]. Older men who hold significant roles in traditional family structures are especially vulnerable to feeling incompetent [8]. UI predicts institutionalization and also early mortality among older males living in the community and in nursing homes [9]. Despite the comparable impact of UI on quality of life for both men and women, male UI has been given less focus in research and discourse [10]. The likelihood of experiencing psychological distress increases when a condition perceived as stigmatized is combined with reduced independence, social isolation, and insufficient professional assistance or support [8]. Men are 90% more likely to restrict their outings because of incontinence, which increases their risk of social isolation, itself a risk for cognitive decline and physical deconditioning [11–13].

## Urinary incontinence interventions

In order to effectively manage UI, particularly in older men, health professionals should integrate psychological, behavioural, and sociocultural interventions [8]. Some older people perceived UI as a normal part of aging, while others were unaware that help was available [14]. Therefore, it is important to provide older adults experiencing UI with education and counseling aimed at helping them better understand the range of treatment options available [8]. Healthcare professionals and caregivers must dispel the commonly held view that UI is normal for older age [8].

Understanding the health choices and treatment preferences of older men to attain outcomes that align with their goals is important if optimal health and quality of well-being outcomes are to be attained. For example, in a study by Hampson and colleagues, treatment attributes that mattered to older men with stress UI included likelihood of dryness, treatment simplicity, surgical avoidance, potential need for future interventions, and understanding others' experiences of treatment regret or satisfaction [15].

UI management in older men should encompass conservative measures, behavioral and physical therapies, as well as drug treatments with the acknowledgement that some men may require surgical intervention for their UI [16].

Conservative management includes: (i) Addressing comorbidities that contribute to lower urinary tract symptoms, including UI. (ii) Treating constipation, which is closely associated with UI. (iii) Utilizing containment devices, particularly for patients who have either not responded to or have declined treatment, or for those for whom treatment

may not be suitable [16]. (iv) Lifestyle modifications, targeting factors such as caffeine intake, obesity, smoking, diet, and physical activity, which are associated with UI [16]. Behavioural and physical therapies, such as bladder training, prompted voiding, and pelvic floor muscle training (PFMT), electrical and magnetic stimulation, and percutaneous tibial nerve stimulation (PTNS), represent additional non-surgical management options [16].

In their investigation into self-care practices among older men and women coping with UI, Johnson and colleagues discovered that over a quarter of respondents employed such practices [11]. These included utilizing containment devices, such as disposable pads (36.8% [271/787]), reducing the number of outdoor visits (27.6% [217/787]), and moderating fluid intake (36.6% [288/787]). Women were more likely than men to utilize disposable pads and engage in exercise therapy [11].

Self-management interventions are designed to improve an individual's medical, behavioral, and motional condition thereby giving them control over their symptoms [17,18]. Informing and advising patients about lifestyle modifications is rarely sufficient to improve their health. This limitation has led to the development of self-management programs, which combine information and advice with techniques to promote behavioral change. Self- management programs aim to help patients manage their disease by enhancing their problem-solving and goal-setting skills [17].

Self-management is a proven intervention for chronic diseases [19]. It emphasizes patient-centered strategies to address challenges, with a focus on modifiable risk factors [20]. Self- management is a promising strategy for managing

chronic conditions such as UI. It requires individuals to be involved in identifying challenges and solving problems related to their health [19].

By engaging stakeholders in intervention mapping, programs and interventions are more likely to be relevant, feasible, and ultimately successful [21].

No existing self-management interventions for UI focus on the needs of older men and none incorporate the perspectives of older men into their development. Furthermore, the health inequalities and disparities in continence services for men, and a low level of health seeking in men with UI make it crucial to incorporate their perspectives into intervention development to ensure optimal outcomes [8,22].

So far, self-management intervention packages for men have targeted uncomplicated lower urinary tract symptoms (LUTS) generally and mostly in men with prostate disease (Benign Prostatic Obstruction). These packages vary in their components, recommendations, and outcomes [23–25].

Changing patient behaviour and maintaining these changes are challenging tasks. There are many interventions that require patients and facilitators to dedicate time and effort. For example, changing caffeine and alcohol consumption patterns may significantly affect quality of life, potentially making them impracticable [25].

Lifestyle factors that can be modified through behavioural adjustments include managing fluids, avoiding certain drinks (caffeine, carbonated beverages, alcohol), prompted voiding (timely reminders to void in those with cognitive impairment), bladder training (a systematic approach to modifying voiding patterns), and pelvic floor muscle exercises/training (PFME/PFMT) [26].

A Cochrane meta-analysis of UI in women suggests that PFMT could serve as a viable first-line therapy for UI, effectively curing or improving symptoms of SUI and other types of UI [27].

In Wu *et al.*'s meta-analysis of male UI after radical prostatectomy, PFME guided by a therapist (G-PFME) aided urinary continence recovery [28]. Similarly, a Cochrane review meta-analysis demonstrated that PFME could accelerate recovery, particularly during the third to sixth months postoperatively, but is unlikely to be effective beyond 12 months [29]. In addition, evidence, primarily from studies focused on women, indicates that enhancing pelvic floor function through PFME could help suppress bladder contractions among individuals with Overactive Bladder (OAB) [27,30].

Both prompted voiding (PV) and bladder training (BT) have demonstrated efficacy in both men and women [26]. BT may assist physically and cognitively functional individuals, though symptom improvement may take months. In contrast, PT can enhance continence in both functional and non-functional individuals but demands extensive and consistent staff management techniques [16].

It is essential to provide older men with education about aids and appliances for managing urinary incontinence so they can feel more confident and comfortable. These tools, ranging from absorbent pads to urinary catheters to penile clamps, offer practical solutions tailored to individual needs [16]. By discussing these options and providing resources such as [www.continenceproductadvisor.org](http://www.continenceproductadvisor.org), men can explore a wide range of products that align with their preferences. Providing support in finding the right product ensures they can effectively manage their condition while maintaining dignity and independence.

In their work, Brown *et al* undertook a formal consensus process in defining lifestyle modifications that were likely to be effective in the self-management of uncomplicated LUTS and incorporated these recommendations into a self-management intervention [25]. However, this work neglected the engagement of men with LUTS.

Yap *et al.*'s randomized controlled trial incorporating a self-management program and standard care resulted in a statistically significant improvement in lower urinary symptoms (LUTS) in the group receiving both interventions, compared to those receiving standard care only [31], demonstrating the value of a self-management program. Brown *et al* reported a decrease in the proportion of patients who needed medication or surgery over 12 months and an improvement in self-rated LUTS in the group of patients who used the self-management program [24].

### **Modes of intervention delivery**

A randomized trial of a continence promotion workshop, paired with an evidence-based self-management booklet, successfully alleviated UI symptoms among community-dwelling older women [32,33].

An online personalized self-management platform, developed by a group of researchers and subsequently tested for utility among experts and usability among men with uncomplicated LUTS, yielded fair results. [34]. To improve on this, and taking into account the levels of health literacy and digital literacy of older men [35,36], we will employ a community-based participatory co-creation approach, actively involving stakeholders throughout the development process [37].



This study will build on systematically synthesized evidence on risk factors for UI in older men [22,38], as well as continence experts' consensus on factors that are potentially modifiable, and older men's perspectives on what they find practicable and are willing to modify, as well as their preferred mode of intervention delivery to co-create a self-management intervention.

## Objectives

- i) To co-create a self-management intervention with an older men and HCP group
- ii) To determine its usability/acceptability among older men with UI.

## Materials and methods

As part of a larger study designed to define, prioritize and co-create a self-management intervention for older men, this study leverages the results of preceding sub-studies, including the first four steps of the systematic stepwise method of the intervention mapping framework to co-create a self-management tool(s), followed by usability/acceptability testing. Globally, IM is widely used for behavioural change interventions. There is a significant increase in disease prevention behaviours associated with IM-based interventions compared with placebo controls [39].

The steps guiding this approach are detailed below:

Step 1 – The logic model of the problem: According to our needs assessment, self-management is an unmet need identified through preliminary discussions with older men with UI attending the continence clinic as well as men on our patient advisory

board. A review of the literature on male UI, components and outcomes of self-management of UI, a scoping review of risk factors for UI in older men, a sequential multimethod consensus study and older men's survey, and the formation of an older men's and experts' participatory group are also covered in step 1.

*Formation of a participatory group of older men with UI and continence care experts:*

Consenting older men with UI will be recruited from an existing group of patient partners. Multidisciplinary experts in continence care will be recruited via the Canadian Continence Foundation (CCF). They will be involved in all steps of the IM process.

The group will consist of a minimum of six stakeholders, with 50% being older men with UI and 50% being continence care experts. Snowballing and formal calls through the CCF will be used to recruit experts and infographics will be distributed to patient partners and seniors' associations.

Step 2 – The logic model of change: Specification of performance objectives, determinants, and change objectives. In Step 2, the group will identify and state expected behavioural and environmental outcomes, identify performance objectives for these outcomes, select determinants for these outcomes, develop matrices of change objectives, and construct a logic model of change. For this step, data from the literature review, empirical findings, older men's and experts' input are triangulated to inform a logic model of change.

Step 3 – Program/intervention design: Program design (selection of intervention strategy that delivers the method in a way that fits the needs of the priority group and the program setting). This step involves generating the program scope and sequence,

choosing theory and evidence-based methods, and creating practical applications to deliver change methods.

The group will initially brainstorm ideas for the program/intervention and select theory- and evidence-based behavior change methods based on the determinants requiring modification. During this stage, program objectives will be organized or categorized according to these determinants.

Theoretical methods conducive to achieving the program objectives will be identified and then translated into practical applications or strategies. A theory-based change method refers to a technique for altering a behavioral determinant of an individual or environmental agent, whereas a practical application is a specific strategy that implements the method in a manner suitable for the priority group and program setting. Certain methods may address multiple determinants, while others may be tailored to specific ones.

Step 4 – Program/intervention production: Program creation and preliminary testing. The various applications/strategies selected in Step 3 will be organized and produced. The group will decide on the overall structure and vehicles of the program. Following this, we will refine the structure and organization of the selected strategies until they are satisfactory. We will then proceed to plan, draft, refine, and produce materials that are culturally relevant and appealing. These materials will undergo pre-testing to ensure their functionality. Pre-testing involves either in-house experts' alpha testing for digital interventions or utility testing for educational programs. Any issues identified during pre-testing guide program/intervention revisions.

In the proposed study, step 4 will be followed by usability/acceptability testing among a sample of older men/potential end users.

Step 5 (Program/intervention implementation plan) and Step 6 (Evaluation plan) will form part of the next study in the overarching self-management program study.

## **Usability/acceptability testing**

Sampling and recruitment strategy: A usability/acceptability survey (Appendix 1) will be conducted among consenting older men recruited from the community, including seniors' associations and retirement living facilities.

For effective usability testing, a sample size of at least 20 users is recommended, sufficient to detect 98% of product problems [40].

## **Data collection procedure and instruments**

For an app, participants will receive access to the self-management tool for a week, after which they will complete the product usability testing scale (aka System Usability Scale-SUS) as well as acceptability testing. For a potential in-person intervention, such as an educational workshop, participants will complete an acceptability survey at the conclusion of the workshop.

Acceptability will be assessed using the acceptability domain questions from the feasibility studies' guidelines by Pearson *et al.* [41].

## **Statistical analysis**

Usability/acceptability data will be analysed using descriptive statistics. The Statistical Package for Social Sciences for Windows (SPSS, version 26.0; IBM Corp, Armonk, New York) will be used for data analysis. Continuous variables will be presented in means and standard deviation (SD), while categorical variables will be presented in proportions. Based on the large database of SUS scores over several years, a benchmark overall mean usability score of 70 (median 70.5) represents a good/usable product [42].

## **Ethical clearance**

This study protocol has been approved by the University of Alberta's Health Research and Ethics Board (Ethics ID: Pro00141446).

Administrative permission will be sought from the seniors' associations and retirement living facility managements. Informed consent will be sought from all the participants.

## **Significance of the anticipated results**

The results will bridge a significant gap in the evidence by providing empirical data and stakeholder inputs in fostering an understanding that will inform production, implementation and maintenance of a patient-centred intervention to improve treatment outcomes and UI-related quality of life. The possibility of deploying the tool as an app increases accessibility for prospective end-users beyond the study setting. It also increases the ease of evaluating process and outcome/effect measures and guarantees

continuous generation of individual progress reports for users and aggregated data for research. A mobile app customized to personal UI risk factors and self-management needs/goals with action reminders/push notifications will enhance performance of tasks that will translate into achieving the desired outcomes.

An in-person delivered intervention, such as an educational workshop offers direct interaction, immediate feedback, and personalized guidance, enhancing learning outcomes. They facilitate networking and relationship building among participants, fostering a supportive community and shared experiences. Face-to-face meetings foster mutual understanding and personal growth by creating an environment where individuals can openly share insights and concerns.

## **Dissemination of results**

Members of the co-creation participatory group will receive a report on the pretesting and usability/acceptability testing. Findings will be disseminated to the public through presentations at conferences or workshops, peer-reviewed publications, institutional research repositories, health blogs, and other social media platforms such as LinkedIn, X (Twitter), and Instagram. Healthcare professionals will receive information through continuing professional development seminars and workshops. Educational materials such as infographics will be distributed to patients through clinics and the public through strategic partners such as seniors' associations.

## References

1. D'Ancona C, Haylen B, Oelke M, Abranches-Monteiro L, Arnold E, Goldman H, et al. The International Continence Society (ICS) report on the terminology for adult male lower urinary tract and pelvic floor symptoms and dysfunction. *Neurourol Urodyn*. 2019 Feb;38(2):433–77.
2. Hayder D, Schnepf W. Urinary incontinence – The family caregivers' perspective. *Z Für Gerontol Geriatr*. 2008 Aug;41(4):261–6.
3. Ouslander JG. Urinary incontinence in the elderly. *West J Med*. 1981 Dec;135(6):482–91.
4. Mitteness LS, Barker JC. Stigmatizing a 'normal' condition: urinary incontinence in late life. *Med Anthropol Q*. 1995 Jun;9(2):188–210.
5. Tennstedt SL, Chiu GR, Link CL, Litman HJ, Kusek JW, McKinlay JB. The effects of severity of urine leakage on quality of life in Hispanic, white, and black men and women: the Boston community health survey. *Urology*. 2010 Jan;75(1):27–33.
6. Harris SS, Link CL, Tennstedt SL, Kusek JW, McKinlay JB. Care seeking and treatment for urinary incontinence in a diverse population. *J Urol*. 2007 Feb;177(2):680–4.
7. Yan F, Xiao LD, Zhou K, Li Z, Tang S. Perceptions and help-seeking behaviours among community-dwelling older people with urinary incontinence: A systematic integrative review. *J Adv Nurs*. 2022;78(6):1574–87.

8. Wilson MMG. Urinary incontinence: bridging the gender gap. *J Gerontol A Biol Sci Med Sci*. 2003 Aug;58(8):752–5.
9. Matsumoto M, Inoue K. Predictors of Institutionalization in Elderly People Living at Home: The Impact of Incontinence and Commode Use in Rural Japan. *J Cross-Cult Gerontol*. 2007 Oct 4;22(4):421–32.
10. Abrams P, Cardozo L, Wagg A, Wein AJ. Incontinence: 6th International Consultation on Incontinence, Tokyo, September 2016. 6th ed. Bristol, England: International Continence Society; 2017.
11. Johnson TM, Kincade JE, Bernard SL, Busby-Whitehead J, DeFries GH. Self-care practices used by older men and women to manage urinary incontinence: results from the national follow-up survey on self-care and aging. *J Am Geriatr Soc*. 2000;48(8):894–902.
12. Hopper S, Wister AV, Cosco TD, Best JR. Social Isolation, Physical Activity, and Subsequent Changes in Cognition Among Middle- and Older-Aged Adults: Results From the Canadian Longitudinal Study on Aging. *Psychosom Med*. 2024 Mar 1;86(2):107–15.
13. Shimada H, Doi T, Tsutsumimoto K, Makino K, Harada K, Tomida K, et al. Elevated Risk of Dementia Diagnosis in Older Adults with Low Frequencies and Durations of Social Conversation. *J Alzheimers Dis JAD*. 2024;98(2):659–69.



14. Vethanayagam N, Orrell A, Dahlberg L, McKee KJ, Orme S, Parker SG, et al. Understanding help-seeking in older people with urinary incontinence: an interview study. *Health Soc Care Community*. 2017;25(3):1061–9.
15. Hampson LA, Shaw NM, Breyer BN, Walter LC, Sudore RL, Cooperberg MR, et al. Patient-identified Treatment Attributes Among Older Men With Stress Urinary Incontinence: A Qualitative Look at What Matters to Patients Making Treatment Decisions. *Urology*. 2023 Jul;177:189–96.
16. O'Connor E, Nic An Riogh A, Karavitakis M, Monagas S, Nambiar A. Diagnosis and Non-Surgical Management of Urinary Incontinence – A Literature Review with Recommendations for Practice. *Int J Gen Med*. 2021 Aug;Volume 14:4555–65.
17. Grady PA, Gough LL. Self-management: a comprehensive approach to management of chronic conditions. *Am J Public Health*. 2014 Aug;104(8):e25-31.
18. Narasimhan M, Allotey P, Hardon A. Self care interventions to advance health and wellbeing: a conceptual framework to inform normative guidance. *BMJ*. 2019 Apr 1;365:l688.
19. Grady PA, Gough LL. Self-management: a comprehensive approach to management of chronic conditions. *Am J Public Health*. 2014 Aug;104(8):e25-31.
20. Swendeman D, Ingram BL, Rotheram-Borus MJ. Common elements in self-management of HIV and other chronic illnesses: an integrative framework. *AIDS Care*. 2009 Oct;21(10):1321–34.

21. Majid U, Kim C, Cako A, Gagliardi AR. Engaging stakeholders in the co-development of programs or interventions using Intervention Mapping: A scoping review. Seale H, editor. PLOS ONE. 2018 Dec 26;13(12):e0209826.
22. Olagundoye O, Odusanya B, Kung JY, Gibson W, Wagg A. A scoping review of risk factors for urinary incontinence in older men. BMC Geriatr. 2023 Sep 2;23(1):534.
23. Albarqouni L, Sanders S, Clark J, Tikkinen KAO, Glasziou P. Self-Management for Men With Lower Urinary Tract Symptoms: A Systematic Review and Meta-Analysis. Ann Fam Med. 2021 Apr;19(2):157–67.
24. Brown CT, Yap T, Cromwell DA, Rixon L, Steed L, Mulligan K, et al. Self management for men with lower urinary tract symptoms: randomised controlled trial. BMJ. 2007 Jan 6;334(7583):25.
25. Brown CT, van der Meulen J, Mundy AR, O'Flynn E, Emberton M. Defining the components of a self-management programme for men with uncomplicated lower urinary tract symptoms: a consensus approach. Eur Urol. 2004 Aug;46(2):254–62; discussion 263.
26. Miller SW, Miller MS. Urological Disorders in Men: Urinary Incontinence and Benign Prostatic Hyperplasia. J Pharm Pract. 2011 Aug;24(4):374–85.
27. Dumoulin C, Cacciari LP, Hay-Smith EJC. Pelvic floor muscle training versus no treatment, or inactive control treatments, for urinary incontinence in women. Cochrane Incontinence Group, editor. Cochrane Database Syst Rev [Internet].

2018 Oct 4 [cited 2024 Apr 20];2018(10). Available from:

<http://doi.wiley.com/10.1002/14651858.CD005654.pub4>

28. Wu MLY, Wang CS, Xiao Q, Peng CH, Zeng TY. The therapeutic effect of pelvic floor muscle exercise on urinary incontinence after radical prostatectomy: a meta-analysis. *Asian J Androl*. 2019;21(2):170.
29. Anderson CA, Omar MI, Campbell SE, Hunter KF, Cody JD, Glazener CM. Conservative management for postprostatectomy urinary incontinence. Cochrane Incontinence Group, editor. *Cochrane Database Syst Rev* [Internet]. 2015 Jan 20 [cited 2024 Apr 17];2015(1). Available from:  
<http://doi.wiley.com/10.1002/14651858.CD001843.pub5>
30. Berghmans B, Van Waalwijk Van Doorn E, Nieman F, De Bie R, Van Den Brandt P, Van Kerrebroeck P. Efficacy of Physical Therapeutic Modalities in Women with Proven Bladder Overactivity. *Eur Urol*. 2002 Jun;41(6):581–7.
31. Yap TL, Brown C, Cromwell DA, van der Meulen J, Emberton M. The impact of self-management of lower urinary tract symptoms on frequency-volume chart measures. *BJU Int*. 2009 Oct;104(8):1104–8.
32. Tannenbaum C, van den Heuvel E, Fritel X, Southall K, Jutai J, Rajabali S, et al. Continence Across Continents To Upend Stigma and Dependency (CACTUS-D): study protocol for a cluster randomized controlled trial. *Trials*. 2015 Dec 10;16(1):565.

33. VandenHeuvel E, Wagg A, Fritel X, Tannenbaum C. CACTUS-D; A RANDOMIZED CONTROLLED TRIAL OF A CONTINENCE PROMOTION INTERVENTION FOR OLDER WOMEN. *The Gerontologist*. 2016 Nov;56(Suppl\_3):416–7.
34. Blanker MH, Brandenbarg P, Slijkhuis BGC, Steffens MG, Balken MR, Jellema P. Development of an online personalized self-management intervention for men with uncomplicated LUTS. *Neurourol Urodyn*. 2019 Aug;38(6):1685–91.
35. Kutner NG, Schechtman KB, Ory MG, Baker DI. Older adults' perceptions of their health and functioning in relation to sleep disturbance, falling, and urinary incontinence. *J Am Geriatr Soc*. 1994 7/ 1/1994;757–62.
36. Blažič BJ, Blažič AJ. Overcoming the digital divide with a modern approach to learning digital skills for the elderly adults. *Educ Inf Technol*. 2020 Jan;25(1):259–79.
37. Bartholomew Eldredge LK. Planning health promotion programs: an intervention mapping approach. Fourth edition. San Francisco, CA: Jossey-Bass & Pfeiffer Imprints, Wiley; 2016. 1 p.
38. Olagundoye O, Kung JY, Gibson W, Wagg A. Urinary incontinence in older men: protocol for a scoping review of risk factors. *BMJ Open*. 2023 Feb 10;13(2):e068956.
39. Garba RM, Gadanya MA. The role of intervention mapping in designing disease prevention interventions: A systematic review of the literature. Bhutta ZA, editor. *PLOS ONE*. 2017 Mar 30;12(3):e0174438.

40. Freitag S, Minton T. How many users do you really need for meaningful usability test results? [Internet]. Openfield article presented at; [cited 2023 Oct 27]. Available from: <https://openfieldx.com/choosing-sample-size-ux-usability-testing-methods/>
41. Pearson N, Naylor PJ, Ashe MC, Fernandez M, Yoong SL, Wolfenden L. Guidance for conducting feasibility and pilot studies for implementation trials. *Pilot Feasibility Stud.* 2020 Dec;6(1):167.
42. Bangor A, Kortum P, Miller J. Determining what individual SUS scores mean: Adding an adjective rating scale. *J Usability Stud.* 2009;4(3):114–23.

# Appendix

## Appendix 1:

Self-management intervention/tool usability and acceptability survey

### Product usability scale

Please check the box that reflects your immediate response to each statement. Don't think too long about each statement. Please make sure you respond to every statement.

If you don't know how to respond, simply check box "3."

|                                                                                                | Strongly Disagree |   |   | Strongly Agree |   |
|------------------------------------------------------------------------------------------------|-------------------|---|---|----------------|---|
| 1. I think that I would like to use this tool/app frequently                                   | 1                 | 2 | 3 | 4              | 5 |
| 2. I found the tool/app unnecessarily complex                                                  | 1                 | 2 | 3 | 4              | 5 |
| 3. I thought the tool/app was easy to use                                                      | 1                 | 2 | 3 | 4              | 5 |
| 4. I think that I would need the support of a technical person to be able to use this tool/app | 1                 | 2 | 3 | 4              | 5 |
| 5. I found the various functions in the tool/app were well integrated                          | 1                 | 2 | 3 | 4              | 5 |
| 6. I thought there was too much inconsistency in this tool/app                                 | 1                 | 2 | 3 | 4              | 5 |
| 7. I imagine that most people would learn to use this tool/app very quickly                    | 1                 | 2 | 3 | 4              | 5 |
| 8. I found the tool/app very awkward to use                                                    | 1                 | 2 | 3 | 4              | 5 |
| 9. I felt very confident using the tool/app                                                    | 1                 | 2 | 3 | 4              | 5 |
| 10. I needed to learn a lot of things before I could get going with this tool/app              | 1                 | 2 | 3 | 4              | 5 |

11. Overall, I would rate the user-friendliness of this product as:

|                                                   |                                                   |                          |                                                   |                                                   |                                                   |                                                   |
|---------------------------------------------------|---------------------------------------------------|--------------------------|---------------------------------------------------|---------------------------------------------------|---------------------------------------------------|---------------------------------------------------|
| <input type="checkbox"/> <input type="checkbox"/> | <input type="checkbox"/> <input type="checkbox"/> | <input type="checkbox"/> | <input type="checkbox"/> <input type="checkbox"/> | <input type="checkbox"/> <input type="checkbox"/> | <input type="checkbox"/> <input type="checkbox"/> | <input type="checkbox"/> <input type="checkbox"/> |
| Worst imaginable                                  | Awful                                             | Poor                     | OK                                                | Good                                              | Excellent                                         | Best imaginable                                   |

**Acceptability survey** (satisfaction with the intervention)

1. How satisfied were you with the intervention?

- a. Very satisfied
- b. Somewhat satisfied
- c. Neither satisfied nor dissatisfied
- d. Somewhat dissatisfied
- e. Very dissatisfied

2. What did you like best about the intervention?

-----

3. Can you identify any disadvantages or limitations of the intervention?

-----

-----
